# Supplementary material
Source: MDPI journal article supplement (https://www.mdpi.com/1999-4907/11/12/1262)
Supplement: s1 [file s1]

**Table S1.** Total organic carbon (TOC) contents of the investigated afforested and the arable soils along with the OC-based contents of vanillyl (V), syringyl (S) and cinnamyl (C) units of lignin as determined by the CuO oxidation method and OC-based lignin contents as determined by spectrophotometric methods (ABSL). Stand labels: PJ = white poplar and common walnut; PJC = PJ intercropped with common hazel; PJA = PJ intercropped with Italian alder; PJE = PJ intercropped with autumn olive; AL = agricultural land. Values are mean and standard deviation of three samples. Superscript letters indicate significant differences within means in the column according to One-way ANOVA at  $p \leq 0.05$  and Tukey test.

| Stands | TOC                       | V                        | S                        | C                         | VSC                       | ABSL                        |
|--------|---------------------------|--------------------------|--------------------------|---------------------------|---------------------------|-----------------------------|
|        | mg g <sup>-1</sup>        | mg g <sup>-1</sup> OC    | mg g <sup>-1</sup> OC    | mg g <sup>-1</sup> OC     | mg g <sup>-1</sup> OC     | mg g <sup>-1</sup> OC       |
| AL     | 8.3 ± 0.24 <sup>c</sup>   | 6.3 ± 0.32 <sup>c</sup>  | 8.2 ± 0.42 <sup>c</sup>  | 2.87 ± 0.12 <sup>a</sup>  | 17.4 ± 0.80 <sup>b</sup>  | 350.8 ± 53.64 <sup>b</sup>  |
| PJ     | 16.8 ± 0.69 <sup>ab</sup> | 10.4 ± 0.57 <sup>a</sup> | 10.1 ± 0.76 <sup>a</sup> | 3.49 ± 0.42 <sup>a</sup>  | 24.0 ± 1.44 <sup>a</sup>  | 350.1 ± 39.19 <sup>b</sup>  |
| PJC    | 17.1 ± 1.18 <sup>ab</sup> | 8.2 ± 0.78 <sup>bc</sup> | 8.9 ± 0.84 <sup>ab</sup> | 1.99 ± 0.22 <sup>b</sup>  | 19.1 ± 1.77 <sup>b</sup>  | 377.2 ± 36.46 <sup>b</sup>  |
| PJA    | 18.9 ± 1.23 <sup>a</sup>  | 7.4 ± 0.33 <sup>bc</sup> | 7.2 ± 0.54 <sup>b</sup>  | 2.53 ± 0.33 <sup>ab</sup> | 17.1 ± 1.13 <sup>b</sup>  | 612.6 ± 48.06 <sup>a</sup>  |
| PJE    | 13.5 ± 0.72 <sup>b</sup>  | 9.5 ± 0.49 <sup>ab</sup> | 9.2 ± 0.45 <sup>ab</sup> | 2.30 ± 0.18 <sup>ab</sup> | 20.9 ± 0.81 <sup>ab</sup> | 448.6 ± 35.61 <sup>ab</sup> |
